# Supplementary material for: Amyloid Beta Oligomers-Induced Ca2+ Entry Pathways: Role of Neuronal Networks, NMDA Receptors and Amyloid Channel Formation
Source: MDPI journal article supplement (doi:10.3390/biomedicines10051153), 2022-05-17
Supplement: s1 [file s1]

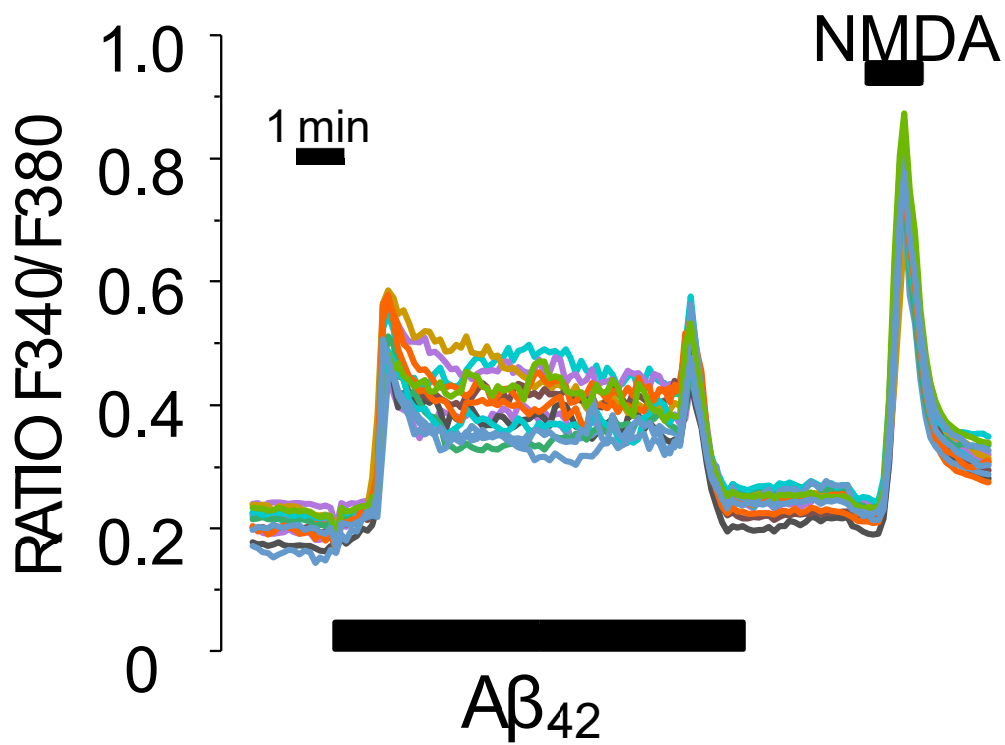

**Supplementary Figure S1. Amyloid  $\beta$  oligomers induce  $\text{Ca}^{2+}$  responses in rat cerebellar neurons.** Rat cerebellar neurons in primary culture were loaded with fura2/AM and subjected to calcium imaging. Traces are representative recordings of Ratio F340/F380 of individual neurons in the same microscopic field stimulated with amyloid  $\beta_{1-42}$  oligomers (2  $\mu\text{M}$ ). Data corresponds to 6 individual neurons and are representative of 5 independent experiments.

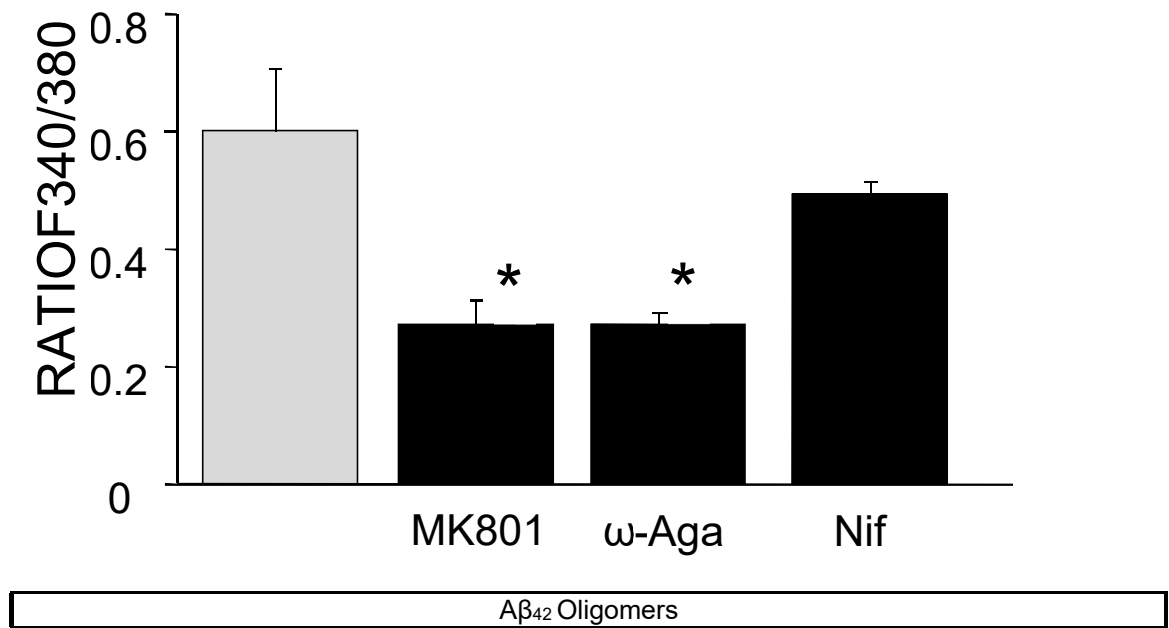

**Supplementary Figure S2. Effects on Ca<sup>2+</sup> channel antagonists on Ca<sup>2+</sup> responses induced by amyloid  $\beta$  oligomers in rat cerebellar neurons.** Rat cerebellar neurons in primary culture were loaded with fura2/AM and subjected to calcium imaging. Cells were stimulated with amyloid  $\beta$  oligomers in the absence and the presence of NMDA receptor blocker MK801 10  $\mu$ M, P/Q type Ca<sup>2+</sup> channel specific antagonist  $\omega$ -agatoxin 100 nM and L-type Ca<sup>2+</sup> channel specific antagonist nifedipine (Nif, 2  $\mu$ M). Bars are mean  $\pm$  SEM values of  $\Delta$ Ratio from 3-5 experiments with 40-55 individual cells in each experiment. \*p<0.05 vs control without antagonist.

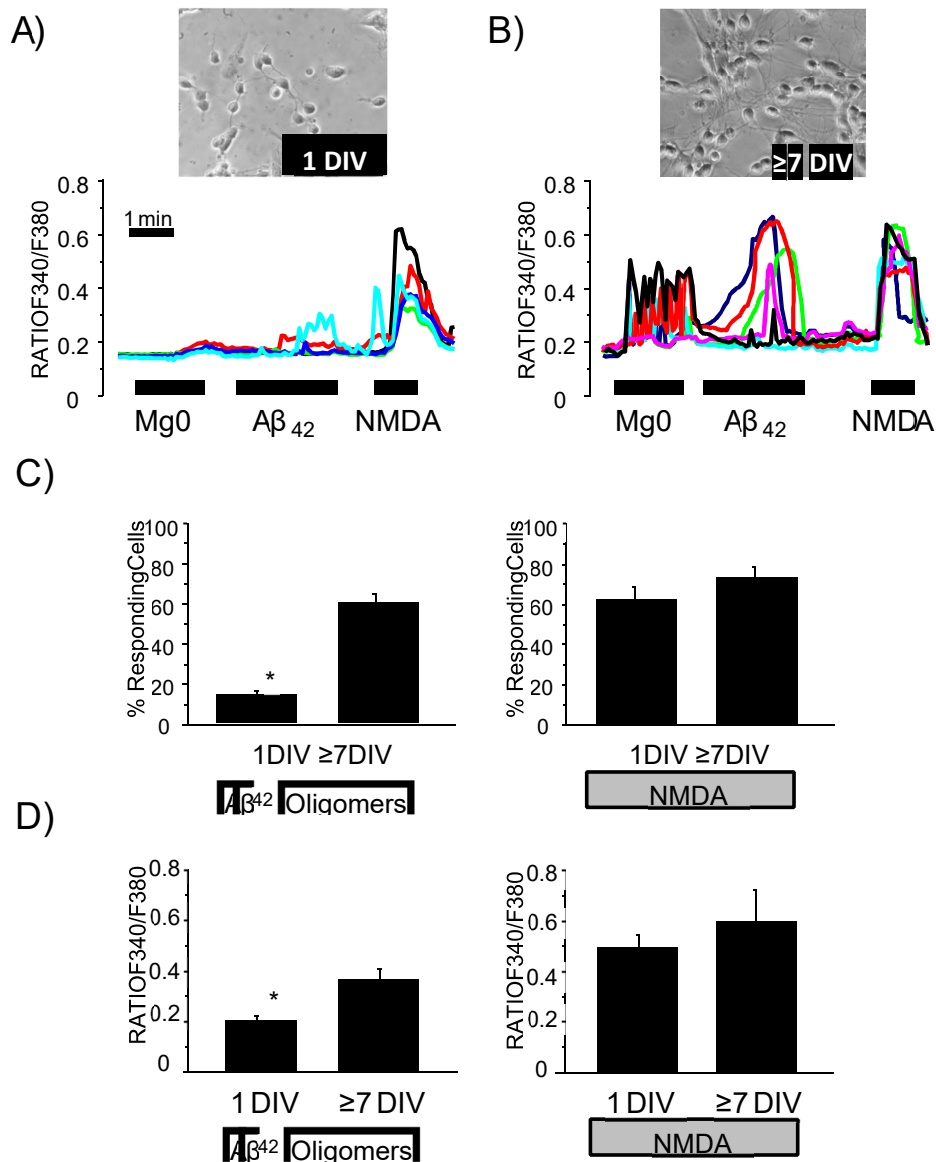

**Supplementary Figure S3. Ca<sup>2+</sup> responses induced by amyloid β oligomers in cerebellar neurons are enhanced in cells showing synchronous Ca<sup>2+</sup> oscillations.** Rat cerebellar neurons in primary culture were loaded with fura2/AM and subjected to calcium imaging. Traces are representative recordings of Ratio F340/F380 of individual neurons cultured for 1 DIV (A) or 7 DIV (B) stimulated with medium lacking extracellular Mg<sup>2+</sup> (Mg 0), amyloid β<sub>1-42</sub> oligomers (Aβ<sub>42</sub>, 2 μM) and NMDA 100 μM. Pictures are representative bright field images of cerebellar cultures at 1 DIV and 7 DIV. Recordings correspond to 4-6 individual cells representative of 284 and 321 cells studied in 15 and 23 independent experiments, respectively. C. Bars show the mean ± SEM values of percent (%) of responsive cells to Aβ oligomers and NMDA at 1 DIV and 7 DIV. D. Bars also show mean ± SEM values of ΔRatio F340/F380 of the Ca<sup>2+</sup> responses induced by Aβ oligomers and NMDA at 1 DIV and 7 DIV. \*p<0.05 vs 7 DIV.

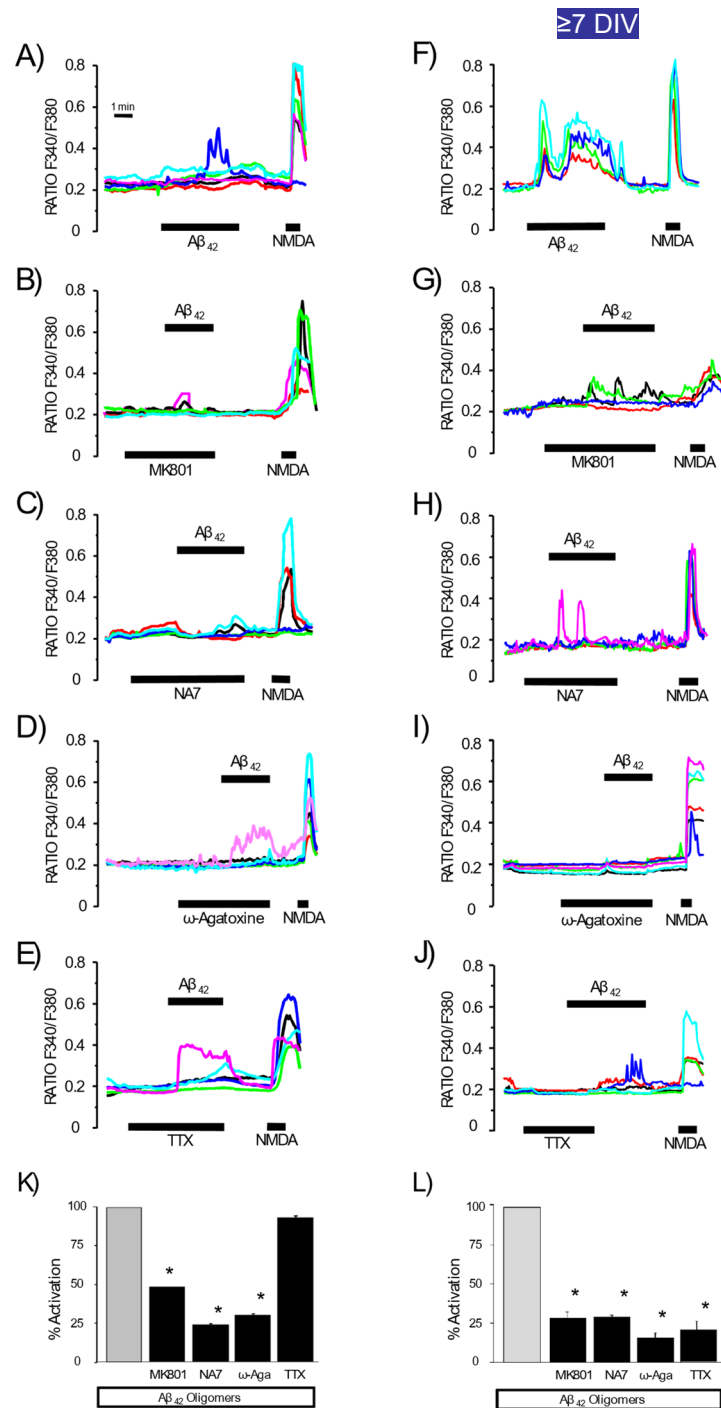

**Supplementary Figure S4. The effects of antagonists on  $\text{Ca}^{2+}$  responses to oligomers in cerebellar neurons depend on the presence of synchronous  $\text{Ca}^{2+}$  oscillations.** Rat cerebellar neurons cultured for 1 DIV or 7 DIV were loaded with fura2/AM and subjected to calcium imaging. Traces are representative recordings of Ratio F340/F380 of individual neurons in the same microscopic field stimulated with Aβ<sub>1-42</sub> oligomers (2 μM) in the absence (A,F) and the presence of the NMDA receptor antagonist MK801 10 μM (B,G), the amyloid channel inhibitor NA7 1 μM (C,H), the P/Q type  $\text{Ca}^{2+}$  channel specific antagonist ωagatoxin 100 nM (D,I) and the Na<sup>+</sup> channel antagonist TTX 500 nM (E,J). Traces correspond to 4-6 individual neurons representative of 160-597 cells studied in 4-11 independent experiments. Bars represent the mean ± SEM values of the  $\text{Ca}^{2+}$  response (% activation corresponding to the fraction of responsive cells multiplied by the ΔRatio) to the oligomers in the absence and the presence of the different antagonists at 1 DIV (K) and 7 DIV (L). \*p<0.05 vs control.

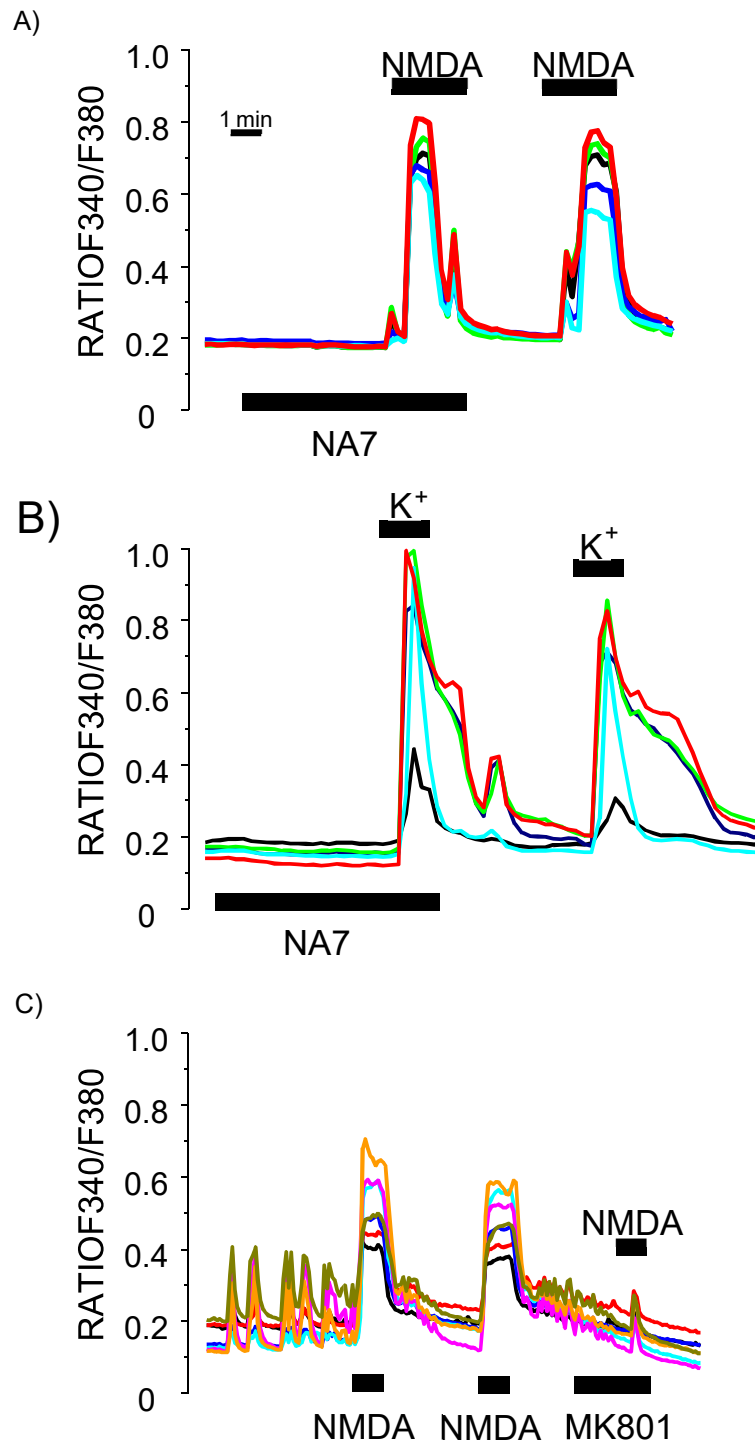

**Supplementary Figure S5. NA7 does not inhibit NMDA receptors or voltage-gated Ca<sup>2+</sup> entry in rat hippocampal neurons.** Rat hippocampal neurons were loaded with fura2/AM and subjected to calcium imaging. Traces are representative recordings of Ratio F340/F380 of individual neurons stimulated with NMDA 100  $\mu$ M (A) and medium containing high concentration of K<sup>+</sup> (B, 75 mM) in the presence and the absence of the amyloid channel blocker NA7 1  $\mu$ M. C shows representative recordings of Ca<sup>2+</sup> responses to NMDA in the absence and the presence of MK801 100  $\mu$ M. Data are representative of 34, 18 and 36 cells studied in at least 3 independent experiments, respectively.

A)

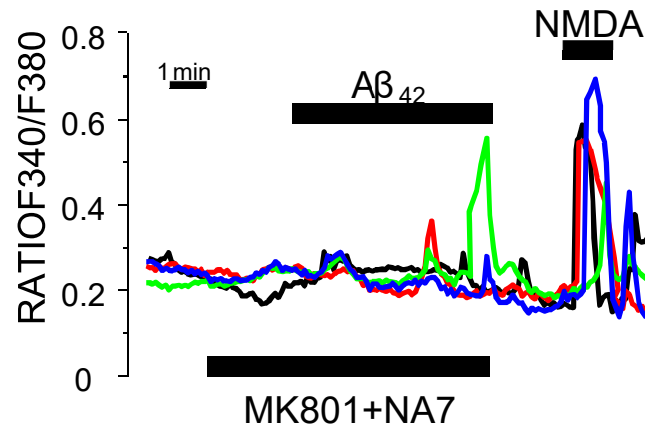

B)

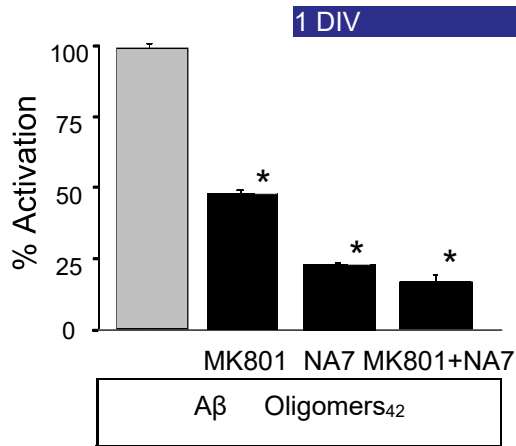

C)

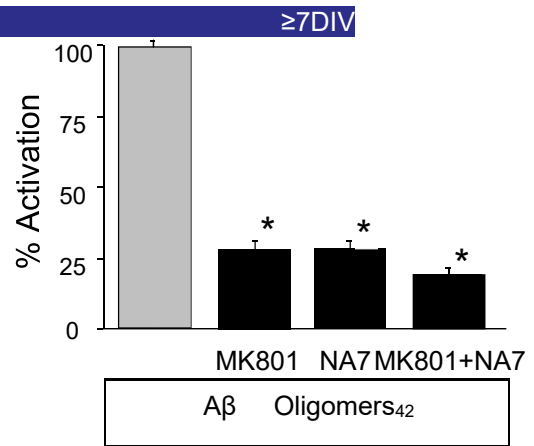

**Supplementary Figure S6. The combination of MK801 and NA7 nearly abolish  $\text{Ca}^{2+}$  responses to amyloid  $\beta$  oligomers in rat cerebellar neurons.** Rat cerebellar neurons cultured for 1 DIV or 7 DIV were loaded with fura2/AM and subjected to calcium imaging. A. Traces are representative recordings of Ratio F340/F380 of individual neurons in the same microscopic field stimulated with  $\text{A}\beta_{1-42}$  oligomers (2  $\mu\text{M}$ ) in the presence of the NMDA receptor antagonist MK801 10  $\mu\text{M}$  and the amyloid channel antagonist NA7 1  $\mu\text{M}$  before stimulating them with NMDA 100  $\mu\text{M}$ . Data are representative of 68 cells studied in 5 independent experiments. Bars represent the mean  $\pm$  SEM values of % activation (fraction of responsive cells multiplied by the  $\Delta\text{Ratio}$ ) of similar experiments in which neurons cultured for 1 DIV (B) or 7 DIV (C) were stimulated with  $\text{A}\beta_{1-42}$  oligomers in the absence of antagonists or the presence of MK801 and NA7 added alone or in combination.

\* $p < 0.05$  vs control. \*\* $p < 0.05$  vs MK801 or NA7 added alone.
